# Supplementary material for: A burst of protein sequence evolution and a prolonged period of asymmetric evolution follow gene duplication in yeast
Source: HighWire-hosted journal article supplement (doi:10.1101/gr.6341207), 2007-11-19
Supplement: Scannell_DupeAcc_SuppTables1-2_3GR010907.pdf [file Scannell_DupeAcc_SuppTables1-2_3GR010907.pdf]

**Supplemental Table 1 : The observation of asymmetry is not conditional on the inclusion of particular post-WGD lineages**

|                                                             | Post-WGD Sequences Excluded from Alignments |                                               |                    |                     |
|-------------------------------------------------------------|---------------------------------------------|-----------------------------------------------|--------------------|---------------------|
|                                                             | None                                        | <i>S. bayanus</i> and<br><i>S. cerevisiae</i> | <i>C. glabrata</i> | <i>S. castellii</i> |
| Asymmetry* of Partitioned Dataset                           | 180.4                                       | 88.13                                         | 92.0               | 145.0               |
| Mean Asymmetry* of Randomized Datasets (100)                | 4                                           | 1                                             | -3                 | 6                   |
| Maximum of Randomized Datasets                              | 190                                         | 76                                            | 148                | 90                  |
| Number of Randomized Datasets exceeding Partitioned Dataset | 1                                           | 0                                             | 1                  | 0                   |
| P-value (Empirical) §                                       | < 0.02                                      | < 0.01                                        | < 0.02             | < 0.01              |

\* As described in the *Main Text*: The sum (%) of the differences in relative rates of protein sequence evolution between the “initially-fast” and “initially-slow” clades for all pairs of duplicate branches excluding the first branches after the WGD.

§ Calculated from the number of randomized datasets whose *Asymmetry* exceeds that of the partitioned dataset.

**Supplemental Table 2 : The observation of asymmetry is not conditional on the inclusion of a particular subset of double-copy genes**

|                                                                      | Percentage of Double-copy Genes Sampled without Replacement for Bootstrap Replicates |          |
|----------------------------------------------------------------------|--------------------------------------------------------------------------------------|----------|
|                                                                      | 100%                                                                                 | 50%      |
| Mean Asymmetry* of Partitioned Datasets (100)                        | 180.4 <sup>†</sup>                                                                   | 95.75    |
| Mean Asymmetry* of Randomized Datasets (100)                         | 4                                                                                    | -6       |
| Maximum of Randomized Datasets                                       | 190                                                                                  | 204      |
| Number of Randomized Datasets exceeding Mean of Partitioned Datasets | 1                                                                                    | 13       |
| P-value (Wilcoxon rank-sum test) ¶                                   | NA                                                                                   | 2.20E-16 |

\* As described in the *Main Text*: The sum (%) of the differences in relative rates of protein sequence evolution between the “initially-fast” and “initially-slow” clades for all pairs of duplicate branches excluding the first branches after the WGD.

<sup>†</sup> A single dataset since when 100% of double-copy genes are sampled without replacement, only one unique partitioning into “Initially-fast” and “Initially-slow” clades exists.

¶ Calculated using the *Asymmetry* scores of 100 partitioned and 100 randomized bootstrap replicates.
